# Supplementary material
Source: PubMed Central journal article supplement (PMC4340719)
Supplement: NIHMS651676-supplement-2.pdf [file NIHMS651676-supplement-2.pdf]

**Supplementary Table 1.** General demographic information of human postmortem brain samples. There were no significant differences between heroin addicts and control groups in pH and age. Student's *t*-tests,  $p = n.s.$

| GROUP   | Cause of Death  | SEX | pH   | AGE | Blood - Morphine | Blood - ETOH |
|---------|-----------------|-----|------|-----|------------------|--------------|
| HEROIN  | heroin          | m   | 6.07 | 31  | 0.03             | 0            |
| HEROIN  | addict:heroin   | f   | 6.48 | 32  | 0.30             | 0            |
| HEROIN  | heroin overdose | m   | 6.8  | 28  | 0.25             | 0            |
| HEROIN  | heroin overdose | m   | 6.66 | 27  | 0.24             | 0            |
| HEROIN  | heroin overdose | f   | 6.36 | 24  | 0.35             | 0            |
| HEROIN  | heroin overdose | m   | 6.52 | 20  | 0.74             | 0            |
| HEROIN  | heroin overdose | m   | 6.68 | 23  | 0.33             | 0            |
| HEROIN  | heroin overdose | m   | 6.47 | 27  | 0.96             | 0            |
| HEROIN  | heroin overdose | m   | 6.23 | 21  | 0.4              | 0            |
| CONTROL | cardiac failure | m   | 6.33 | 30  | 0.00             | 0            |
| CONTROL | cardiac failure | f   | 6.82 | 36  | 0.00             | 0            |
| CONTROL | cardiac failure | f   | 6.98 | 31  | 0.00             | 0            |
| CONTROL | sudden death    | m   | 6.87 | 26  | 0.00             | 0            |
| CONTROL | sudden natural  | m   | 6.70 | 28  | 0.00             | 0            |

**Supplementary Table 2. PCR Primers****Human qPCR primers**

| Target gene                 | Primer sequence (5' – 3') |
|-----------------------------|---------------------------|
| hs- <i>Rn18s</i>            | CGCCGCTAGAGGTGAAATTC      |
| hs- <i>Rn18s</i> _rev       | CATTCTTGGCAAATGCTTTCG     |
| hs- <i>Bdnf</i> exon IX     | TTTCTCGTGACAGCATGAGCAG    |
| hs- <i>Bdnf</i> exon IX_rev | GTCCTCATCCAACAGCTCTTCTATC |

**Rat qPCR primers**

| Target gene               | Primer sequence (5' – 3')  |
|---------------------------|----------------------------|
| <i>Gapdh</i>              | GTGGACCTCATGGCCTACAT       |
| <i>Gapdh</i> _rev         | TGTGAGGGAGATGCTCAGTG       |
| <i>Bdnf</i> exon I        | AGTTGCTTTGTCTTCTGTAATCGC   |
| <i>Bdnf</i> exon I_rev    | ATTCACGCTCTCCAGAGTCCCATG   |
| <i>Bdnf</i> exon II       | TTGGCTTCCTAGCGGTGTAG       |
| <i>Bdnf</i> exon II_rev   | CGTGGACGTTTGCTTCTTTC       |
| <i>Bdnf</i> exon III      | CCGGGCTGGATGCTTC           |
| <i>Bdnf</i> exon III_rev  | TCCAGAGGAAGTGAAAGTTTTGACT  |
| <i>Bdnf</i> exon IV       | CTGCCTTGATGTTTACTTTGACAAG  |
| <i>Bdnf</i> exon IV_rev   | ACCATAGTAAGGAAAAGGATGGTCAT |
| <i>Bdnf</i> exon V        | CATAACCCCGCACACTCTGT       |
| <i>Bdnf</i> exon V_rev    | GACCCTCTCTGTCCATCCAG       |
| <i>Bdnf</i> exon VI       | CAGGAGCGTGACAACAATGTGA     |
| <i>Bdnf</i> exon VI_rev   | ACCATAGTAAGGAAAAGGATGGTCAT |
| <i>Bdnf</i> exon VII      | CCTGAAAGGGTCTGCGGAACTCCA   |
| <i>Bdnf</i> exon VII_rev  | GAAGTGTACAAGTCCGCGTCCTTA   |
| <i>Bdnf</i> exon VIII     | GTGTGTGTCTCTGCGCCTCAGTGGA  |
| <i>Bdnf</i> exon VIII_rev | GAAGTGTACAAGTCCGCGTCCTTA   |
| <i>Bdnf</i> exon IX       | GGGTGAAACAAAGTGGCTGT       |
| <i>Bdnf</i> exon IX_rev   | ATGTTGTCAAACGGCACAAA       |
| <i>Nurr1</i>              | GAAGATTCTGGCTTTGCTG        |
| <i>Nurr1</i> _rev         | CTGGGTTGGACCTGTATGCT       |

**Mouse qPCR primers**

| Target gene                | Primer sequence (5' – 3') |
|----------------------------|---------------------------|
| m- <i>Gapdh</i>            | AACTTTGGCATTGTGGAAGG      |
| m- <i>Gapdh</i> _rev       | ACACATTGGGGGTAGGAACA      |
| m- <i>Bdnf</i> exon IX     | CTCAGGCAGAATGAGCAATG      |
| m- <i>Bdnf</i> exon IX_rev | AGCCGTCTGTGCTCTTCACT      |
| m- <i>Ezh2</i>             | ATCTGAGAAGGGACCGGTTT      |
| m- <i>Ezh2</i> _rev        | TGTGCACAGGCTGTATCCTC      |
| m- <i>Creb1</i>            | GTGTTACGTGGGGGAGAGAA      |
| m- <i>Creb1</i> _rev       | GGGCTAATGTGGCAATCTGT      |
| m- <i>Nurr1</i>            | GACCGGCTCTATGGAGATCA      |
| m- <i>Nurr1</i> _rev       | CTGGGTTGGACCTGTATGCT      |

**Supplementary Table 3. Rat qChIP PCR Primers**

| Target gene          | Primer sequence (5' – 3') |
|----------------------|---------------------------|
| <i>Bdnf</i> -p1      | TTCGATTCACGCAGTTGTTC      |
| <i>Bdnf</i> -p1_rev  | GCAGCCTCTCTGAGCCAGT       |
| <i>Bdnf</i> -p2      | CGTGGAACAAACTTGGGACT      |
| <i>Bdnf</i> -p2_rev  | CCCTTGCGGATGTCAATTAT      |
| <i>Bdnf</i> -p4      | GCGCGGAATTCTGATTCTGGTAAT  |
| <i>Bdnf</i> -p4_rev  | GAGAGGGCTCCACGCTGCCTTGACG |
| <i>Bdnf</i> -p6      | TGCAGGGGAATTAGGGATAC      |
| <i>Bdnf</i> -p6_rev  | TCTTCGGTTGAGCTTCGATT      |
| <i>Bdnf</i> -eI      | CAGTGACAGGCGTTGAGAAA      |
| <i>Bdnf</i> -eI_rev  | AACGCCCTCATTCTGAGAGA      |
| <i>Bdnf</i> -eII     | AAAGCGTCTTTTCCGAGGTT      |
| <i>Bdnf</i> -eII_rev | CAGCCTACACCGCTAGGAAG      |
| <i>Bdnf</i> -eIV     | ACTGAAGGCGTGCGAGTATT      |
| <i>Bdnf</i> -eIV_rev | AGTCTTTGGTGGCCGATATG      |
| <i>Bdnf</i> -eVI     | CTGGCAGGCTTTGATGAGAC      |
| <i>Bdnf</i> -eVI_rev | CACATTGTTGTCACGCTCCT      |
| <i>Th</i> -p         | CTAATGGGACGGAGGCCTTT      |
| <i>Th</i> -p_rev     | GTCCCGAGTTCTGTCTCCAC      |
| <i>Grial</i> -p      | CTGGGAGAGAAGCAGAGGAA      |
| <i>Grial</i> -p_rev  | CTGCCAGCTCTCTATGCTGA      |
| <i>Nurr1</i> -p      | ATCGTCGAGCAAGGGTAGTG      |
| <i>Nurr1</i> -p_rev  | CCGCCCTTGAAAATATGTCT      |

**Supplementary Table 4. Rat qChIP PCR Primers for validation**

| Target gene       | Location (from TSS) | Primer sequence (5' – 3') | Related epigenetic modification                                                                                    |
|-------------------|---------------------|---------------------------|--------------------------------------------------------------------------------------------------------------------|
| <i>Actb-1</i>     | -250                | TCGCCAAACTCTTCATCCTC      | Pol II <sup>49-51</sup> , H3K36me <sup>351</sup>                                                                   |
| <i>Actb-1_rev</i> | -52                 | GCCATAAAAGGCAACTTTTCG     |                                                                                                                    |
| <i>Actb-2</i>     | 1639                | CGATCGCCTTTCTGACTAGG      | Pol II <sup>49-51</sup> , H3K36me <sup>351</sup><br>(Within intron3)                                               |
| <i>Actb-2_rev</i> | 1808                | GCTGGGAGTATCAGGACAGG      |                                                                                                                    |
| <i>Actb-3</i>     | 2770                | GATCATTGCTCCTCCTGAGC      | Pol II <sup>49-51</sup> , H3K36me <sup>351</sup><br>(Within exon6)                                                 |
| <i>Actb-3_rev</i> | 2922                | AGTCCGCCTAGAAGCATTTCG     |                                                                                                                    |
| <i>Gapdh</i>      | -156                | TGAGAGAGGCCCAGCTACTC      | Pol II <sup>52</sup> , acH3 <sup>52</sup> , acH4 <sup>52</sup> ,<br>H3K4me <sup>353</sup> , H3K36me <sup>353</sup> |
| <i>Gapdh_rev</i>  | -4                  | AGGGCTGCAGTCCGTATTTC      |                                                                                                                    |
| <i>Rpl30</i>      | 498                 | GGAAAGTACGTGCTGGGGTA      | acH3 <sup>54</sup> , H3K4me <sup>355</sup><br>(Within exon3)                                                       |
| <i>Rpl30_rev</i>  | 650                 | TTCTTCCCAATGCTGGAATC      |                                                                                                                    |
| <i>Myod1</i>      | -115                | CAAGCTCCGCCCTACTACAC      | H3K27me <sup>352</sup> , EZH2 <sup>56</sup> , SUZ12 <sup>57</sup>                                                  |
| <i>Myod1_rev</i>  | 49                  | TGTGGTGAAGAAAGCAGTCG      |                                                                                                                    |
| <i>Afm</i>        | 444                 | TGTACACACTCACACACAAACACA  | H3K9me <sup>252</sup> , H3K27me <sup>352</sup> , G9a <sup>58</sup><br>(Within intron1)                             |
| <i>Afm_rev</i>    | 632                 | GCTTTGCTCTTGCGTAGTC       |                                                                                                                    |
| <i>Myt1-1</i>     | -184                | GATGGGAAAGTGGATCTGGA      | H3K9me <sup>359</sup> , H3K27me <sup>359</sup>                                                                     |
| <i>Myt1-1_rev</i> | -26                 | GGGCCAGGAAGGATAGTCTC      |                                                                                                                    |
| <i>Myt1-2</i>     | -1903               | TCCCCTTTAGAGGAGGCACT      | H3K9me <sup>359</sup> , H3K27me <sup>359</sup>                                                                     |
| <i>Myt1-2_rev</i> | -1732               | CCGGGAAAGGGAATAACATT      |                                                                                                                    |
| <i>Hoxa2</i>      | -165                | CCCCATACGGCTGTAATCAG      | H3K27me <sup>360</sup> , RING1A <sup>61</sup> ,<br>RING1B <sup>62</sup> , BMI1 <sup>63</sup>                       |
| <i>Hoxa2_rev</i>  | 10                  | CGTAATTCATGGCCTTCTCC      |                                                                                                                    |
| <i>Esr1</i>       | -203                | GGGGGCTGGAGTTTCTTCTA      | mSIN3a <sup>64</sup>                                                                                               |
| <i>Esr1_rev</i>   | 10                  | TATGTGGAGTGGCAGGGACT      |                                                                                                                    |
| <i>Nr4a3</i>      | -674                | GGGCCAGAGAGACGTAAACA      | CREB <sup>65</sup><br>Containing CREB binding motif                                                                |
| <i>Nr4a3_rev</i>  | -524                | CTTCCGAAAGGGAAGGCTAC      |                                                                                                                    |
| <i>Bdnf</i>       | 1219                | CGCACGTGACAAAACGTAAG      | NURR1 <sup>32</sup><br>*Containing NBRE (NGFI-B<br>response element)-like sequence <sup>30</sup><br>-Within exon2  |
| <i>Bdnf_rev</i>   | 1294                | CTACCACCTCGGACAAATCC      |                                                                                                                    |
| <i>Pitx3</i>      | -1293               | GGTGGGAAGTCCTGAAGGT       | NURR1 <sup>30</sup><br>*Containing NBRE (NGFI-B<br>response element)-like sequence <sup>30</sup>                   |
| <i>Pitx3_rev</i>  | -1095               | ATTTGCAAGGGACAGGACAG      |                                                                                                                    |
| <i>Th</i>         | -1055               | AGGAAATGACTCCAGGGACA      | NURR1 <sup>66</sup><br>*Containing NBRE (NGFI-B<br>response element)-like sequence <sup>30</sup>                   |
| <i>Th_rev</i>     | -865                | CATGGTACCCCGAGGTCTAA      |                                                                                                                    |

\* Putative Nurr1 binding motif, 5'-AAAGGTCA-3' or one base deviation
