# Supplementary material
Source: PubMed Central journal article supplement (PMC4340719)
Supplement: NIHMS651676-supplement-3.pdf [file NIHMS651676-supplement-3.pdf]

Corresponding Author: Eric J. Nestler

Manuscript Number: NN-A47529A

Manuscript Type: Article

# Main Figures: 5

# Supplementary Figures: 10

# Supplementary Tables: 5

# Supplementary Videos: N/A

## Reporting Checklist for Nature Neuroscience

This checklist is used to ensure good reporting standards and to improve the reproducibility of published results. For more information, please read [Reporting Life Sciences Research](#).

Please note that in the event of publication, it is mandatory that authors include all relevant methodological and statistical information in the manuscript.

### ► Statistics reporting, by figure

- Please specify the following information for each panel reporting quantitative data, and where each item is reported (section, e.g. Results, & paragraph number).
- Each figure legend should ideally contain an exact sample size (n) for each experimental group/condition, where n is an exact number and not a range, a clear definition of how n is defined (for example x cells from x slices from x animals from x litters, collected over x days), a description of the statistical test used, the results of the tests, any descriptive statistics and clearly defined error bars if applicable.
- For any experiments using custom statistics, please indicate the test used and stats obtained for each experiment.
- Each figure legend should include a statement of how many times the experiment shown was replicated in the lab; the details of sample collection should be sufficiently clear so that the replicability of the experiment is obvious to the reader.
- For experiments reported in the text but not in the figures, please use the paragraph number instead of the figure number.

**Note:** Mean and standard deviation are not appropriate on small samples, and plotting independent data points is usually more informative. When technical replicates are reported, error and significance measures reflect the experimental variability and not the variability of the biological process; it is misleading not to state this clearly.

|                            |                             | TEST USED             |              | n                                  |                       |                                             | DESCRIPTIVE STATS (AVERAGE, VARIANCE) |             | P VALUE               |                 | DEGREES OF FREEDOM & F/t/z/R/ETC VALUE |  |
|----------------------------|-----------------------------|-----------------------|--------------|------------------------------------|-----------------------|---------------------------------------------|---------------------------------------|-------------|-----------------------|-----------------|----------------------------------------|--|
| FIGURE NUMBER              | WHICH TEST?                 | SECTION & PARAGRAPH # | EXACT VALUE  | DEFINED?                           | SECTION & PARAGRAPH # | REPORTED?                                   | SECTION & PARAGRAPH #                 | EXACT VALUE | SECTION & PARAGRAPH # | VALUE           | SECTION & PARAGRAPH #                  |  |
| example<br>1a              | one-way ANOVA               | Fig. legend           | 9, 9, 10, 15 | mice from at least 3 litters/group | Methods para 8        | error bars are mean +/- SEM                 | Fig. legend                           | p = 0.044   | Fig. legend           | F(3, 36) = 2.97 | Fig. legend                            |  |
| example<br>results, para 6 | unpaired t-test             | Results para 6        | 15           | slices from 10 mice                | Results para 6        | error bars are mean +/- SEM                 | Results para 6                        | p = 0.0006  | Results para 6        | t(28) = 2.808   | Results para 6                         |  |
| +<br>-<br>sf1a             | student's t test (unpaired) | legend                | n=5,9/group  | human postmortem samples           | legend                | median, quartiles (boxes), range (whiskers) | legend                                | p=0.0223    | legend                | t(12)=2.623     | legend                                 |  |

|               |             | TEST USED                   |             | n                                                                                                |                                                               |           | DESCRIPTIVE STATS (AVERAGE, VARIANCE)       |             | P VALUE                                                            |        | DEGREES OF FREEDOM & F/t/z/R/ETC VALUE                                                  |        |
|---------------|-------------|-----------------------------|-------------|--------------------------------------------------------------------------------------------------|---------------------------------------------------------------|-----------|---------------------------------------------|-------------|--------------------------------------------------------------------|--------|-----------------------------------------------------------------------------------------|--------|
| FIGURE NUMBER | WHICH TEST? | SECTION & PARAGRAPH #       | EXACT VALUE | DEFINED?                                                                                         | SECTION & PARAGRAPH #                                         | REPORTED? | SECTION & PARAGRAPH #                       | EXACT VALUE | SECTION & PARAGRAPH #                                              | VALUE  | SECTION & PARAGRAPH #                                                                   |        |
| +<br>-        | 1b          | student's t test (unpaired) | legend      | n=10,14/group                                                                                    | rats from at least 3 litters/group                            | legend    | median, quartiles (boxes), range (whiskers) | legend      | p=0.0106                                                           | legend | t(22)=2.793                                                                             | legend |
| +<br>-        | 1c          | student's t test (unpaired) | legend      | n=9/group                                                                                        | rats from at least 3 litters/group                            | legend    | median, quartiles (boxes), range (whiskers) | legend      | p=0.00995                                                          | legend | t(16)=2.923                                                                             | legend |
| +<br>-        | 1d          | student's t test (unpaired) | legend      | n=12/group                                                                                       | mice from at least 3 litters/group                            | legend    | median, quartiles (boxes), range (whiskers) | legend      | p=0.0423                                                           | legend | t(22)=2.155                                                                             | legend |
| +<br>-        | 2a          | two-way ANOVA               | legend      | n=9/group, for all bdnf exons                                                                    | rats from at least 3 litters/group                            | legend    | mean +/- SEM                                | legend      | region effect, p=0.435; drug effect, p<0.001; interaction, p=0.805 | legend | region effect, F(3,64)=0.923; drug effect, F(1,64)=12.898; interaction, F(3,64)=0.328   | legend |
| +<br>-        | 2c          | two-way ANOVA               | legend      | n=6/group, for bdnf p1; n=6,5/group, for bdnf p2; n=6/group, for bdnf p4; n=6/group, for bdnf p6 | rats from at least 2 litters/group<br>2 animals pooled/sample | legend    | mean +/- SEM                                | legend      | region effect, p=0.395; drug effect, p<0.001; interaction, p=0.362 | legend | region effect, F(3,39)=1.019; drug effect, F(1,39)=13.279; interaction, F(3,39)=1.096   | legend |
| +<br>-        | 2d          | two-way ANOVA               | legend      | n=5/group, for bdnf p1; n=5,4/group, for bdnf p2; n=5/group, for bdnf p4; n=5/group, for bdnf p6 | rats from at least 2 litters/group<br>2 animals pooled/sample | legend    | mean +/- SEM                                | legend      | region effect, p=0.002; drug effect, p<0.001; interaction, p=0.069 | legend | region effect, F(3,31)=6.474; drug effect, F(1,31)=18.820; interaction, F(3,31)=2.609   | legend |
| +<br>-        | 2e          | two-way ANOVA               | legend      | n=5/group, for all bdnf exons                                                                    | rats from at least 2 litters/group<br>2 animals pooled/sample | legend    | mean +/- SEM                                | legend      | region effect, p=1.000; drug effect, p<0.001; interaction, p=0.919 | legend | region effect, F(3,32)=0.00309; drug effect, F(1,32)=19.291; interaction, F(3,32)=0.165 | legend |

|        |            |                  |        |                                                                                                                                                       |                                       |        |              |        |                                                                                   |        |                                                                                                      |        |
|--------|------------|------------------|--------|-------------------------------------------------------------------------------------------------------------------------------------------------------|---------------------------------------|--------|--------------|--------|-----------------------------------------------------------------------------------|--------|------------------------------------------------------------------------------------------------------|--------|
| +<br>- | 3a<br>sf2a | two-way<br>ANOVA | legend | n=4/<br>group,<br>for bdnf<br>p1;<br>n=4/<br>group,<br>for bdnf<br>p2;<br>n=4/<br>group,<br>for bdnf<br>p4;<br>n=3,4/<br>group,<br>for bdnf<br>p6     | rats from at least<br>3 litters/group | legend | mean +/- SEM | legend | region effect,<br>p=0.252;<br>drug effect,<br>p=0.061;<br>interaction,<br>p=0.163 | legend | region effect,<br>F(3,23)=1.458;<br>drug effect,<br>F(1,23)=3.876;<br>interaction,<br>F(3,23)=1.872  | legend |
| +<br>- | 3a<br>sf2b | two-way<br>ANOVA | legend | n=5,4/<br>group,<br>for bdnf<br>p1;<br>n=4/<br>group,<br>for bdnf<br>p2;<br>n=5,4/<br>group,<br>for bdnf<br>p4;<br>n=5,4/<br>group,<br>for bdnf<br>p6 | rats from at least<br>3 litters/group | legend | mean +/- SEM | legend | region effect,<br>p=0.698;<br>drug effect,<br>p=0.002;<br>interaction,<br>p=0.906 | legend | region effect,<br>F(3,27)=0.482;<br>drug effect,<br>F(1,27)=11.509;<br>interaction,<br>F(3,27)=0.184 | legend |
| +<br>- | 3a<br>sf2c | two-way<br>ANOVA | legend | n=4,5/<br>group,<br>for bdnf<br>p1;<br>n=5/<br>group,<br>for bdnf<br>p2;<br>n=5/<br>group,<br>for bdnf<br>p4;<br>n=5/<br>group,<br>for bdnf<br>p6     | rats from at least<br>3 litters/group | legend | mean +/- SEM | legend | region effect,<br>p=0.157;<br>drug effect,<br>p=0.337;<br>interaction,<br>p=0.132 | legend | region effect,<br>F(3,31)=1.857;<br>drug effect,<br>F(1,31)=0.950;<br>interaction,<br>F(3,31)=2.017  | legend |
| +<br>- | 3a<br>sf2d | two-way<br>ANOVA | legend | n=4/<br>group,<br>for all<br>bdnf<br>promoter<br>s                                                                                                    | rats from at least<br>3 litters/group | legend | mean +/- SEM | legend | region effect,<br>p=0.231;<br>drug effect,<br>p=0.546;<br>interaction,<br>p=0.425 | legend | region effect,<br>F(3,18)=1.570;<br>drug effect,<br>F(1,18)=0.379;<br>interaction,<br>F(3,18)=0.978  | legend |
| +<br>- | 3a<br>sf2e | two-way<br>ANOVA | legend | n=5/<br>group,<br>for all<br>bdnf<br>promoter<br>s                                                                                                    | rats from at least<br>3 litters/group | legend | mean +/- SEM | legend | region effect,<br>p=0.552;<br>drug effect,<br>p=0.537;<br>interaction,<br>p=0.585 | legend | region effect,<br>F(3,32)=0.712;<br>drug effect,<br>F(1,32)=0.389;<br>interaction,<br>F(3,32)=0.657  | legend |

|        |            |                                   |        |                                                                                                                                                     |                                                                      |        |                                                   |        |                                                                                   |        |                                                                                                       |        |
|--------|------------|-----------------------------------|--------|-----------------------------------------------------------------------------------------------------------------------------------------------------|----------------------------------------------------------------------|--------|---------------------------------------------------|--------|-----------------------------------------------------------------------------------|--------|-------------------------------------------------------------------------------------------------------|--------|
| +<br>- | 3a<br>sf2f | two-way<br>ANOVA                  | legend | n=4/<br>group,<br>for bdnf<br>p1;<br>n=4/<br>group,<br>for bdnf<br>p2;<br>n=4,3/<br>group,<br>for bdnf<br>p4;<br>n=4,3/<br>group,<br>for bdnf<br>p6 | rats from at least<br>3 litters/group                                | legend | mean +/- SEM                                      | legend | region effect,<br>p=0.003;<br>drug effect,<br>p=0.708;<br>interaction,<br>p=0.003 | legend | region effect,<br>F(3,22)=6.442;<br>drug effect,<br>F(1,22)=0.144;<br>interaction,<br>F(3,22)=6.178   | legend |
| +<br>- | 3a<br>sf2g | two-way<br>ANOVA                  | legend | n=6,5/<br>group,<br>for all<br>bdnf<br>promoter<br>s                                                                                                | rats from at least<br>3 litters/group                                | legend | mean +/- SEM                                      | legend | region effect,<br>p=0.819;<br>drug effect,<br>p=0.124;<br>interaction,<br>p=0.707 | legend | region effect,<br>F(3,36)=0.309;<br>drug effect,<br>F(1,36)=2.482;<br>interaction,<br>F(3,36)=0.467   | legend |
| +<br>- | 3a         | student's t<br>test<br>(unpaired) | legend | n=4/<br>group,<br>for acH3                                                                                                                          | rats from at least<br>3 litters/group                                | legend | mean +/- SEM                                      | legend | p=0.0417, for<br>acH3                                                             | legend | t(6)=2.581, for<br>acH3                                                                               | legend |
| +<br>- | 3a         | student's t<br>test<br>(unpaired) | legend | n=5/<br>group,<br>for<br>H3K4me3                                                                                                                    | rats from at least<br>3 litters/group                                | legend | mean +/- SEM                                      | legend | p=0.0495, for<br>H3K4me3                                                          | legend | t(8)=2.312, for<br>H3K4me3                                                                            | legend |
| +<br>- | 3b<br>sf2h | two-way<br>ANOVA                  | legend | n=6,5/<br>group,<br>for all<br>bdnf<br>promoter<br>s                                                                                                | rats from at least<br>2 litters/group<br>2 animals pooled/<br>sample | legend | mean +/- SEM                                      | legend | region effect,<br>p=0.653;<br>drug effect,<br>p<0.001;<br>interaction,<br>p=0.709 | legend | region effect,<br>F(3,36)=0.541;<br>drug effect,<br>F(1,36)=25.829;<br>interaction,<br>F(3,36)=0.464  | legend |
| +<br>- | 3b<br>sf2i | two-way<br>ANOVA                  | legend | n=5,4/<br>group,<br>for all<br>bdnf<br>promoter<br>s                                                                                                | rats from at least<br>2 litters/group<br>2 animals pooled/<br>sample | legend | mean +/- SEM                                      | legend | region effect,<br>p=0.614;<br>drug effect,<br>p<0.001;<br>interaction,<br>p=0.651 | legend | region effect,<br>F(3,28)=2.450;<br>drug effect,<br>F(1,28)=37.786;<br>interaction,<br>F(3,28)=0.552  | legend |
| +<br>- | 3c<br>sf2j | two-way<br>ANOVA                  | legend | n=4/<br>group,<br>for bdnf<br>p1;<br>n=3,4/<br>group,<br>for bdnf<br>p2;<br>n=4/<br>group,<br>for bdnf<br>p4;<br>n=4/<br>group,<br>for bdnf<br>p6   | rats from at least<br>2 litters/group<br>2 animals pooled/<br>sample | legend | median,<br>quartiles (boxes),<br>range (whiskers) | legend | region effect,<br>p=0.106;<br>drug effect,<br>p<0.001;<br>interaction,<br>p=0.118 | legend | region effect,<br>F(3,23)=2.285;<br>drug effect,<br>F(1,23)=24.884;<br>interaction,<br>F(3,23)=2.177  | legend |
| +<br>- | 3d<br>sf2k | two-way<br>ANOVA                  | legend | n=5,4/<br>group,<br>for all<br>bdnf<br>promoter<br>s                                                                                                | rats from at least<br>2 litters/group<br>2 animals pooled/<br>sample | legend | median,<br>quartiles (boxes),<br>range (whiskers) | legend | region effect,<br>p=0.927;<br>drug effect,<br>p=0.951;<br>interaction,<br>p=0.927 | legend | region effect,<br>F(3,27)=0.153;<br>drug effect,<br>F(1,27)=0.00384;<br>interaction,<br>F(3,27)=0.153 | legend |
| +<br>- | 3e<br>sf2l | two-way<br>ANOVA                  | legend | n=4/<br>group,<br>for all<br>bdnf<br>promoter<br>s                                                                                                  | rats from at least<br>2 litters/group<br>2 animals pooled/<br>sample | legend | mean +/- SEM                                      | legend | region effect,<br>p=0.327;<br>drug effect,<br>p=0.002;<br>interaction,<br>p=0.668 | legend | region effect,<br>F(3,24)=1.211;<br>drug effect,<br>F(1,24)=12.662;<br>interaction,<br>F(3,24)=0.526  | legend |

|        |            |                                   |        |                                                                                                                                                   |                                                                      |        |                                                   |        |                                                                                   |        |                                                                                                       |        |
|--------|------------|-----------------------------------|--------|---------------------------------------------------------------------------------------------------------------------------------------------------|----------------------------------------------------------------------|--------|---------------------------------------------------|--------|-----------------------------------------------------------------------------------|--------|-------------------------------------------------------------------------------------------------------|--------|
| +<br>- | 3e<br>sf2m | two-way<br>ANOVA                  | legend | n=4,3/<br>group,<br>for all<br>bdnf<br>promoter<br>s                                                                                              | rats from at least<br>2 litters/group<br>2 animals pooled/<br>sample | legend | mean +/- SEM                                      | legend | region effect,<br>p=0.332;<br>drug effect,<br>p<0.001;<br>interaction,<br>p=0.368 | legend | region effect,<br>F(3,20)=1.209;<br>drug effect,<br>F(1,20)=16.872;<br>interaction,<br>F(3,20)=1.111  | legend |
| +<br>- | 3f<br>sf2n | two-way<br>ANOVA                  | legend | n=4/<br>group,<br>for all<br>bdnf<br>promoter<br>s                                                                                                | rats from at least<br>2 litters/group<br>2 animals pooled/<br>sample | legend | mean +/- SEM                                      | legend | region effect,<br>p=0.997;<br>drug effect,<br>p<0.001;<br>interaction,<br>p=0.067 | legend | region effect,<br>F(3,24)=0.0154;<br>drug effect,<br>F(1,24)=13.708;<br>interaction,<br>F(3,24)=2.713 | legend |
| +<br>- | 3f<br>sf2o | two-way<br>ANOVA                  | legend | n=4/<br>group,<br>for bdnf<br>p1;<br>n=3,4/<br>group,<br>for bdnf<br>p2;<br>n=4/<br>group,<br>for bdnf<br>p4;<br>n=4/<br>group,<br>for bdnf<br>p6 | rats from at least<br>2 litters/group<br>2 animals pooled/<br>sample | legend | mean +/- SEM                                      | legend | region effect,<br>p=0.848;<br>drug effect,<br>p=0.253;<br>interaction,<br>p=0.827 | legend | region effect,<br>F(3,23)=0.267;<br>drug effect,<br>F(1,23)=1.372;<br>interaction,<br>F(3,23)=0.298   | legend |
| +<br>- | 3f<br>sf2p | two-way<br>ANOVA                  | legend | n=5/<br>group,<br>for all<br>bdnf<br>promoter<br>s                                                                                                | rats from at least<br>2 litters/group<br>2 animals pooled/<br>sample | legend | mean +/- SEM                                      | legend | region effect,<br>p=0.950;<br>drug effect,<br>p=0.002;<br>interaction,<br>p=0.991 | legend | region effect,<br>F(3,32)=0.117;<br>drug effect,<br>F(1,32)=10.975;<br>interaction,<br>F(3,32)=0.0345 | legend |
| +<br>- | 3h         | student's t<br>test<br>(unpaired) | legend | n=9/<br>group                                                                                                                                     | mice from at least<br>3 litters/group                                | legend | median,<br>quartiles (boxes),<br>range (whiskers) | legend | p=0.0456                                                                          | legend | t(16)=2.168                                                                                           | legend |
| +<br>- | 3i         | student's t<br>test<br>(unpaired) | legend | n=12/<br>group                                                                                                                                    | mice from at least<br>3 litters/group                                | legend | mean +/- SEM                                      | legend | p=0.000435                                                                        | legend | t(22)=4.134                                                                                           | legend |
| +<br>- | 4a         | two-way<br>ANOVA                  | legend | n=5/<br>group,<br>for all<br>bdnf<br>promoter<br>s                                                                                                | rats from at least<br>2 litters/group<br>2 animals pooled/<br>sample | legend | mean +/- SEM                                      | legend | region effect,<br>p=0.774;<br>drug effect,<br>p<0.001;<br>interaction,<br>p=0.745 | legend | region effect,<br>F(3,32)=0.371;<br>drug effect,<br>F(1,32)=15.053;<br>interaction,<br>F(3,32)=0.412  | legend |
| +<br>- | 4b         | two-way<br>ANOVA                  | legend | n=4/<br>group,<br>for all<br>bdnf<br>promoter<br>s                                                                                                | rats from at least<br>2 litters/group<br>2 animals pooled/<br>sample | legend | mean +/- SEM                                      | legend | region effect,<br>p=0.399;<br>drug effect,<br>p<0.001;<br>interaction,<br>p=0.489 | legend | region effect,<br>F(3,24)=1.026;<br>drug effect,<br>F(1,24)=32.487;<br>interaction,<br>F(3,24)=0.834  | legend |
| +<br>- | 4d         | Mann-<br>Whitney<br>U test        | legend | n=9,8/<br>group                                                                                                                                   | mice from at least<br>3 litters/group                                | legend | median,<br>quartiles (boxes),<br>range (whiskers) | legend | p=0.006                                                                           | legend | U=7                                                                                                   | legend |
| +<br>- | 4f         | student's t<br>test<br>(unpaired) | legend | n=10/<br>group                                                                                                                                    | mice from at least<br>4 litters/group                                | legend | median,<br>quartiles (boxes),<br>range (whiskers) | legend | p=0.0220                                                                          | legend | t(18)=2.506                                                                                           | legend |
| +<br>- | 4g         | two-way<br>ANOVA                  | legend | n=8,6/<br>group,<br>for all<br>bdnf<br>promoter<br>s                                                                                              | rats from at least 2<br>litters/group<br>2 animals pooled/<br>sample | legend | mean +/- SEM                                      | legend | region effect,<br>p=0.087;<br>drug effect,<br>p<0.001;<br>interaction,<br>p=0.087 | legend | region effect,<br>F(3,48)=2.318;<br>drug effect,<br>F(1,48)=35.413;<br>interaction,<br>F(3,48)=2.318  | legend |

|        |    |                                                                                             |        |                                                                                                                                                      |                                                            |        |                                                   |        |                                                                                                              |        |                                                                                                             |        |
|--------|----|---------------------------------------------------------------------------------------------|--------|------------------------------------------------------------------------------------------------------------------------------------------------------|------------------------------------------------------------|--------|---------------------------------------------------|--------|--------------------------------------------------------------------------------------------------------------|--------|-------------------------------------------------------------------------------------------------------------|--------|
| +<br>- | 4g | Mann-Whitney U test, for bdnf p1 & p6;<br><br>student's t test (unpaired), for bdnf p2 & p4 | legend | n=8,6/<br>group,<br>for all<br>bdnf<br>promoter<br>s                                                                                                 | rats from at least 2 litters/group 2 animals pooled/sample | legend | mean +/- SEM                                      | legend | p=0.013,<br>for bdnf p1;<br>p=0.012,<br>for bdnf p2;<br>p=0.0166,<br>for bdnf p4;<br>p=0.003,<br>for bdnf p6 | legend | U=5,<br>for bdnf p1;<br>t(12)=2.957,<br>for bdnf p2;<br>t(12)=2.781,<br>for bdnf p4;<br>U=2,<br>for bdnf p6 | legend |
| +<br>- | 4h | two-way ANOVA                                                                               | legend | n=5,6/<br>group,<br>for all<br>bdnf<br>promoter<br>s                                                                                                 | rats from at least 2 litters/group 2 animals pooled/sample | legend | mean +/- SEM                                      | legend | region effect,<br>p=0.908;<br>drug effect,<br>p<0.001;<br>interaction,<br>p=0.957                            | legend | region effect,<br>F(3,36)=0.182;<br>drug effect,<br>F(1,36)=25.091;<br>interaction,<br>F(3,36)=0.104        | legend |
| +<br>- | 5a | two-way ANOVA                                                                               | legend | n=4,5/<br>group,<br>for bdnf<br>p1;<br>n=4/<br>group<br>for bdnf<br>p2;<br>n=4,5/<br>group,<br>for bdnf<br>p4;<br>n=4,5/<br>group,<br>for bdnf<br>p6 | rats from at least 2 litters/group 2 animals pooled/sample | legend | mean +/- SEM                                      | legend | region effect,<br>p=0.752;<br>drug effect,<br>p<0.001;<br>interaction,<br>p=0.412                            | legend | region effect,<br>F(3,27)=0.403;<br>drug effect,<br>F(1,27)=17.990;<br>interaction,<br>F(3,27)=0.990        | legend |
| +<br>- | 5b | student's t test (unpaired)                                                                 | legend | n=9,8/<br>group                                                                                                                                      | rats from at least 3 litters/group                         | legend | median,<br>quartiles (boxes),<br>range (whiskers) | legend | p=0.0241                                                                                                     | legend | t(15)=2.509                                                                                                 | legend |
| +<br>- | 5c | student's t test (unpaired)                                                                 | legend | n=8,10/<br>group                                                                                                                                     | rats from at least 3 litters/group                         | legend | median,<br>quartiles (boxes),<br>range (whiskers) | legend | p=0.0461                                                                                                     | legend | t(16)=2.162                                                                                                 | legend |
| +<br>- | 5d | student's t test (unpaired)                                                                 | legend | n=5/<br>group                                                                                                                                        | rats from at least 2 litters/group                         | legend | median,<br>quartiles (boxes),<br>range (whiskers) | legend | p=0.0257                                                                                                     | legend | t(8)=2.733                                                                                                  | legend |
| +<br>- | 5e | student's t test (unpaired)                                                                 | legend | n=10,8/<br>group                                                                                                                                     | rats from at least 4 litters/group 2 animals pooled/sample | legend | median,<br>quartiles (boxes),<br>range (whiskers) | legend | p=0.0363                                                                                                     | legend | t(16)=2.285                                                                                                 | legend |
| +<br>- | 5f | student's t test (unpaired) w/ Welch's correction                                           | legend | n=9/<br>group                                                                                                                                        | mice from at least 3 litters/group                         | legend | median,<br>quartiles (boxes),<br>range (whiskers) | legend | p=0.0157                                                                                                     | legend | t(9.496)=2.935                                                                                              | legend |
| +<br>- | 5h | one-way ANOVA                                                                               | legend | n=10,8,9/<br>group                                                                                                                                   | mice from at least 4 litters/group                         | legend | mean +/- SEM                                      | legend | p=0.0188                                                                                                     | legend | F(2,24)=4.712                                                                                               | legend |
| +<br>- | 5j | student's t test (unpaired) w/ Welch's correction                                           | legend | n=9,10/<br>group                                                                                                                                     | rats from at least 2 litters/group                         | legend | median,<br>quartiles (boxes),<br>range (whiskers) | legend | p=0.0328                                                                                                     | legend | t(10.98)=2.440                                                                                              | legend |
| +<br>- | 5k | student's t test (unpaired)                                                                 | legend | n=8,7/<br>group                                                                                                                                      | mice from at least 3 litters/group                         | legend | mean +/- SEM                                      | legend | p=0.0496                                                                                                     | legend | t(13)=2.165                                                                                                 | legend |
| +<br>- | 5l | student's t test (unpaired)                                                                 | legend | n=10,9/<br>group                                                                                                                                     | mice from at least 4 litters/group                         | legend | mean +/- SEM                                      | legend | p=0.6897                                                                                                     | legend | t(17)=0.4062                                                                                                | legend |

|        |                           |                                                                                        |                   |                                                                                         |                                    |                   |              |                       |                                                                                                       |                   |                                                                                                                                     |                   |
|--------|---------------------------|----------------------------------------------------------------------------------------|-------------------|-----------------------------------------------------------------------------------------|------------------------------------|-------------------|--------------|-----------------------|-------------------------------------------------------------------------------------------------------|-------------------|-------------------------------------------------------------------------------------------------------------------------------------|-------------------|
| +<br>- | sf1b                      | two-way RM ANOVA                                                                       | legend            | n=9,14/<br>group                                                                        | rats from at least 3 litters/group | legend            | mean +/- SEM | legend                | day effect, p<0.001; drug effect, p<0.001; interaction, p<0.001                                       | legend            | day effect, F(9,378)=4.660; drug effect, F(3,378)=13.854; interaction, F(27,378)=2.520                                              |                   |
| +<br>- | sf1c                      | for day 0-14: two-way RM ANOVA;<br>for day 28: one-way ANOVA                           | legend            | for day 0-14: n=18/<br>group;<br>for day 28: n=9/<br>group                              | rats from at least 6 litters/group | legend            | mean +/- SEM | legend                | for day 0-14: day effect, p<0.001; drug effect, p=0.402; interaction, p<0.001;<br>for day 28: p<0.001 | legend            | for day 0-14: day effect, F(3,102)=81.073; drug effect, F(1,102)=0.722; interaction, F(3,102)=42.097;<br>for day 28: F(3,32)=22.412 |                   |
| +<br>- | resul<br>ts,<br>para<br>2 | one-way ANOVA                                                                          | results,<br>para2 | n=9/<br>group                                                                           | rats from at least 6 litters/group | results,<br>para2 | mean +/- SEM | result<br>s,<br>para2 | p=0.0181                                                                                              | results,<br>para2 | F(3,32)=3.872                                                                                                                       | results,<br>para2 |
| +<br>- | sf1d                      | student's t test (unpaired)                                                            | legend            | n=12/<br>group                                                                          | rats from at least 2 litters/group | legend            | mean +/- SEM | legend                | p=0.000855                                                                                            | legend            | t(22)=4.801                                                                                                                         |                   |
| +<br>- | sf1e                      | student's t test (unpaired), for Bdnf III & VII;<br>Mann-Whitney U test, for Bdnf VIII | legend            | n=8/<br>group,<br>for Bdnf III & VII;<br>n=7,8/<br>group,<br>for Bdnf VIII              | rats from at least 2 litters/group | legend            | mean +/- SEM | legend                | p=0.576, for Bdnf III; p=0.987, for Bdnf VII; p=0.867, for Bdnf VIII                                  | legend            | t(14)=0.573, for Bdnf III; t(14)=0.0163, for Bdnf VII; U=26, for Bdnf VIII                                                          | legend            |
| +<br>- | sf3a                      | student's t test (unpaired)                                                            | legend            | n=9/<br>group                                                                           | mice from at least 3 litters/group | legend            | mean +/- SEM | legend                | p=0.00774                                                                                             | legend            | t(16)=3.044                                                                                                                         | legend            |
| +<br>- | sf3a                      | Mann-Whitney U test                                                                    | legend            | n=9/<br>group,<br>for th;<br>n=9/<br>group,<br>for gria1                                | mice from at least 3 litters/group | legend            | mean +/- SEM | legend                | p=0.185, for th; p=0.377, for gria1                                                                   | legend            | U=25, for th; U=30, for gria1                                                                                                       | legend            |
| +<br>- | sf3c                      | student's t test (unpaired)                                                            | legend            | n=11/<br>group                                                                          | rats from at least 3 litters/group | legend            | mean +/- SEM | legend                | p=0.0403                                                                                              | legend            | t(20)=2.193                                                                                                                         | legend            |
| +<br>- | sf3d                      | one-way ANOVA                                                                          | legend            | n=5,4,5/<br>group                                                                       | rats from at least 3 litters/group | legend            | mean +/- SEM | legend                | p=0.0280                                                                                              | legend            | F(2,11)=5.003                                                                                                                       | legend            |
| +<br>- | sf4a                      | student's t test (unpaired), for SN & VTA;<br>Mann-Whitney U test, for RN              | legend            | n=7/<br>group,<br>for all regions                                                       | rats from at least 3 litters/group | legend            | mean +/- SEM | legend                | p=0.312, for SN; p=0.209, for RN; p=0.0352, for VTA                                                   | legend            | t(12)=1.056, for SN; U=14, for RN; t(12)=2.373, for VTA                                                                             |                   |
| +<br>- | sf4b                      | one-way ANOVA                                                                          | legend            | n=6/<br>group,<br>for SN;<br>n=6/<br>group,<br>for RN;<br>n=5,6,6/<br>group,<br>for VTA | rats from at least 3 litters/group | legend            | mean +/- SEM | legend                | p=0.457, for SN; p=0.409, for RN; p=0.050, for VTA                                                    | legend            | F(2,15)=0.825, for SN; F(2,15)=0.949, for RN; F(2,14)=3.764, for VTA                                                                | legend            |

|        |      |                                                                                           |        |                                                                                         |                                                                      |        |              |        |                                                                                                               |        |                                                                                                                         |        |
|--------|------|-------------------------------------------------------------------------------------------|--------|-----------------------------------------------------------------------------------------|----------------------------------------------------------------------|--------|--------------|--------|---------------------------------------------------------------------------------------------------------------|--------|-------------------------------------------------------------------------------------------------------------------------|--------|
| +<br>- | sf4c | one-way ANOVA                                                                             | legend | n=6/<br>group,<br>for SN;<br>n=6/<br>group,<br>for RN;<br>n=5,6,6/<br>group,<br>for VTA | rats from at least<br>3 litters/group                                | legend | mean +/- SEM | legend | p=0.593, for<br>SN;<br>p=0.451, for<br>RN;<br>p=0.022, for<br>VTA                                             | legend | F(2,15)=0.541,<br>for SN;<br>F(2,15)=0.841,<br>for RN;<br>F(2,14)=5.092,<br>for VTA                                     | legend |
| +<br>- | sf5a | student's t<br>test<br>(unpaired)                                                         | legend | n=9/<br>group                                                                           | mice from at least<br>3 litters/group                                | legend | mean +/- SEM | legend | p=0.0422                                                                                                      | legend | t(16)=2.208                                                                                                             | legend |
| +<br>- | sf5b | student's t<br>test<br>(unpaired)                                                         | legend | n=10/<br>group                                                                          | mice from at least<br>3 litters/group                                | legend | mean +/- SEM | legend | p=0.000391                                                                                                    | legend | t(18)=4.344                                                                                                             | legend |
| +<br>- | sf5c | student's t<br>test<br>(unpaired)                                                         | legend | n=5/<br>group                                                                           | rats from at least<br>2 litters/group                                | legend | mean +/- SEM | legend | p=0.00514                                                                                                     | legend | t(8)=3.813                                                                                                              | legend |
| +<br>- | sf5d | Mann-<br>Whitney<br>U test                                                                | legend | n=5/<br>group                                                                           | rats from at least<br>2 litters/group                                | legend | mean +/- SEM | legend | p=0.032                                                                                                       | legend | U=2                                                                                                                     | legend |
| +<br>- | sf6a | student's t<br>test<br>(unpaired)                                                         | legend | n=9,7/<br>group,<br>for th;<br>n=5,4/<br>group,<br>for gria1                            | rats from at least<br>3 litters/group                                | legend | mean +/- SEM | legend | p=0.0482,<br>for th;<br>p=0.0416,<br>for gria1                                                                | legend | t(14)=2.165,<br>for th;<br>t(7)=2.489,<br>for gria1                                                                     | legend |
| +<br>- | sf6b | student's t<br>test<br>(unpaired),<br>for th;<br>Mann-<br>Whitney<br>U test, for<br>gria1 | legend | n=5,4/<br>group,<br>for th;<br>n=5,4/<br>group,<br>for gria1                            | rats from at least<br>3 litters/group                                | legend | mean +/- SEM | legend | p=0.715,<br>for th;<br>p=0.905,<br>for gria1                                                                  | legend | t(7)=0.380,<br>for th;<br>U=9,<br>for gria1                                                                             | legend |
| +<br>- | sf6c | student's t<br>test<br>(unpaired),<br>for th;<br>Mann-<br>Whitney<br>U test, for<br>gria1 | legend | n=5/<br>group,<br>for th;<br>n=5/<br>group,<br>for gria1                                | rats from at least<br>3 litters/group                                | legend | mean +/- SEM | legend | p=0.977,<br>for th;<br>p=0.310,<br>for gria1                                                                  | legend | t(8)=0.0297,<br>for th;<br>U=7,<br>for gria1                                                                            | legend |
| +<br>- | sf6d | two-way<br>ANOVA                                                                          | legend | n=5/<br>group,<br>for all<br>bdnf<br>promoter<br>s                                      | rats from at least<br>2 litters/group<br>2 animals pooled/<br>sample | legend | mean +/- SEM | legend | region effect,<br>p=0.941;<br>drug effect,<br>p<0.001;<br>interaction,<br>p=0.941                             | legend | region effect,<br>F(3,32)=0.132;<br>drug effect,<br>F(1,32)=32.004;<br>interaction,<br>F(3,32)=0.132                    | legend |
| +<br>- | sf6e | two-way<br>ANOVA                                                                          | legend | n=3,4/<br>group,<br>for all<br>bdnf<br>promoter<br>s                                    | rats from at least<br>2 litters/group<br>2 animals pooled/<br>sample | legend | mean +/- SEM | legend | region effect,<br>p=0.123;<br>drug effect,<br>p=0.027;<br>interaction,<br>p=0.123                             | legend | region effect,<br>F(3,20)=2.175;<br>drug effect,<br>F(1,20)=5.683;<br>interaction,<br>F(3,20)=2.175                     | legend |
| +<br>- | sf6f | two-way<br>ANOVA                                                                          | legend | n=5,6/<br>group                                                                         | rats from at least<br>2 litters/group                                | legend | mean +/- SEM | legend | region effect,<br>p=0.656;<br>drug effect,<br>p<0.001;<br>interaction,<br>p=0.656                             | legend | region effect,<br>F(3,36)=0.542;<br>drug effect,<br>F(1,36)=19.593;<br>interaction,<br>F(3,36)=0.542                    | legend |
| +<br>- | sf6f | student's t<br>test<br>(unpaired)                                                         | legend | n=5,6/<br>group                                                                         | rats from at least<br>2 litters/group                                | legend | mean +/- SEM | legend | p=0.0211,<br>for bdnf p1;<br>p=0.0341,<br>for bdnf p2;<br>p=0.0313<br>for bdnf p4;<br>p=0.239,<br>for bdnf p6 | legend | t(9)=2.789,<br>for bdnf p1;<br>t(9)=2.495,<br>for bdnf p2;<br>t(9)=2.549,<br>for bdnf p4;<br>t(9)=1.262,<br>for bdnf p6 | legend |



|   |   |      |                                 |        |                                                                                                                                              |                                                                   |        |              |        |                                                                                                           |        |                                                                                                                                     |        |
|---|---|------|---------------------------------|--------|----------------------------------------------------------------------------------------------------------------------------------------------|-------------------------------------------------------------------|--------|--------------|--------|-----------------------------------------------------------------------------------------------------------|--------|-------------------------------------------------------------------------------------------------------------------------------------|--------|
| + | - | sf7a | student's t test (unpaired)     | legend | n=9,10/<br>group                                                                                                                             | rats from at least 3 litters/group                                | legend | mean +/- SEM | legend | p=0.0448                                                                                                  | legend | t(17)=2.166                                                                                                                         | legend |
| + | - | sf7b | for day 0-14, two-way RM ANOVA; | legend | for day 0-14: n=11,27/<br>group;<br><br>for day 28: n=5, for SS-TMT; n=6, for SS-NURR1; n=10, for MS-TMT; n=8, for MM-TMT; n=9, for MM-NURR1 | rats from at least 6 litters/group                                | legend | mean +/- SEM | legend | for day 0-14: day effect, p<0.001; drug effect, p=0.012; interaction, p<0.001;<br><br>for day 28: p=0.031 | legend | for day 0-14: day effect, F(1,36)=54.272; drug effect, F(1,36)=7.087; interaction, F(1.36)=13.080;<br><br>for day 28: F(4,37)=3.031 | legend |
| + | - | sf7c | student's t test (unpaired)     | legend | n=3/<br>group                                                                                                                                | rats from at least 3 litters/group<br>5 animals pooled/<br>sample | legend | mean +/- SEM | legend | p=0.000251                                                                                                | legend | t(4)=12.297                                                                                                                         | legend |
| + | - | sf7d | student's t test (unpaired)     | legend | n=3/<br>group                                                                                                                                | rats from at least 3 litters/group<br>5 animals pooled/<br>sample | legend | mean +/- SEM | legend | p=0.212                                                                                                   | legend | t(4)=1.483                                                                                                                          |        |
| + | - | sf7e | student's t test (unpaired)     | legend | n=3/<br>group                                                                                                                                | rats from at least 3 litters/group<br>5 animals pooled/<br>sample | legend | mean +/- SEM | legend | p=0.600                                                                                                   | legend | t(4)=0.569                                                                                                                          |        |
| + | - | sf9a | one-way ANOVA                   | legend | n=3/<br>group                                                                                                                                | rats from at least 3 litters/group<br>2 animals pooled/           | legend | mean +/- SEM | legend | p=0.044                                                                                                   | legend | F(3,8)=4.297                                                                                                                        |        |
| + | - | sf9b | one-way ANOVA                   | legend | n=3/<br>group                                                                                                                                | rats from at least 3 litters/group<br>2 animals pooled/           | legend | mean +/- SEM | legend | p=0.004                                                                                                   | legend | F(3,8)=10.535                                                                                                                       |        |
| + | - | sf9c | one-way ANOVA                   | legend | n=3/<br>group                                                                                                                                | rats from at least 3 litters/group<br>2 animals pooled/           | legend | mean +/- SEM | legend | p=0.016                                                                                                   | legend | F(3,8)=6.970                                                                                                                        |        |
| + | - | sf9d | one-way ANOVA                   | legend | n=3/<br>group                                                                                                                                | rats from at least 3 litters/group                                | legend | mean +/- SEM | legend | p<0.001                                                                                                   | legend | F(4,10)=214.998                                                                                                                     |        |
| + | - | sf9e | one-way ANOVA                   | legend | n=3/<br>group                                                                                                                                | rats from at least 3 litters/group                                | legend | mean +/- SEM | legend | p=0.027                                                                                                   | legend | F(4,10)=4.378                                                                                                                       |        |
| + | - | sf9f | one-way ANOVA                   | legend | n=3, for all groups; but n=2, for Myt1-2                                                                                                     | rats from at least 3 litters/group                                | legend | mean +/- SEM | legend | p<0.001                                                                                                   | legend | F(5,11)=27.039                                                                                                                      |        |
| + | - | sf9g | one-way ANOVA                   | legend | n=3/<br>group                                                                                                                                | rats from at least 3 litters/group                                | legend | mean +/- SEM | legend | p<0.001                                                                                                   | legend | F(5,12)=13.836                                                                                                                      |        |
| + | - | sf9h | one-way ANOVA                   | legend | n=3/<br>group                                                                                                                                | rats from at least 3 litters/group                                | legend | mean +/- SEM | legend | p<0.001                                                                                                   | legend | F(5,12)=31.043                                                                                                                      |        |
| + | - | sf9i | one-way ANOVA                   | legend | n=3/<br>group                                                                                                                                | rats from at least 3 litters/group                                | legend | mean +/- SEM | legend | p<0.001                                                                                                   | legend | F(6,14)=41.67                                                                                                                       |        |
| + | - | sf9j | one-way ANOVA                   | legend | n=6/<br>group                                                                                                                                | rats from at least 4 litters/group                                | legend | mean +/- SEM | legend | p<0.001                                                                                                   | legend | F(3,20)=35.617                                                                                                                      |        |

|   |   |      |                             |        |                                                                                    |                                                                   |        |              |        |          |        |               |  |
|---|---|------|-----------------------------|--------|------------------------------------------------------------------------------------|-------------------------------------------------------------------|--------|--------------|--------|----------|--------|---------------|--|
| + | - | sf9k | one-way ANOVA               | legend | n=3, for Esr1; n=4, for Rpl30; n=3, for Myod1                                      | rats from at least 3 litters/group<br>2 animals pooled/           | legend | mean +/- SEM | legend | p=0.024  | legend | F(2,7)=6.708  |  |
| + | - | sf9l | one-way ANOVA               | legend | n=3, for Esr1; n=3, for Myod1; n=4, for Afm                                        | rats from at least 3 litters/group<br>2 animals pooled/           | legend | mean +/- SEM | legend | p=0.013  | legend | F(2,7)=8.670  |  |
| + | - | sf9m | one-way ANOVA               | legend | n=4/<br>group                                                                      | rats from at least 3 litters/group<br>2 animals pooled/           | legend | mean +/- SEM | legend | p=0.025  | legend | F(2,9)=5.757  |  |
| + | - | sf9n | student's t test (unpaired) | legend | n=4, for Rpl30; n=3, for Afm                                                       | rats from at least 2 litters/group<br>2 animals pooled/<br>sample | legend | mean +/- SEM | legend | p=0.043  | legend | t(5)=4.024    |  |
| + | - | sf9o | student's t test (unpaired) | legend | n=3/<br>group                                                                      | rats from at least 2 litters/group<br>2 animals pooled/<br>sample | legend | mean +/- SEM | legend | p=0.0459 | legend | t(4)=2.861    |  |
| + | - | sf9p | student's t test (unpaired) | legend | n=3, for Gapdh; n=4, for Myod1                                                     | rats from at least 2 litters/group<br>2 animals pooled/<br>sample | legend | mean +/- SEM | legend | p=0.0375 | legend | t(5)=2.811    |  |
| + | - | sf9q | one-way ANOVA               | legend | n=4, for Gapdh; n=4, for Hoxa2; n=3, for Myod1                                     | rats from at least 3 litters/group<br>2 animals pooled/<br>sample | legend | mean +/- SEM | legend | p=0.023  | legend | F(2,8)=6.314  |  |
| + | - | sf9r | one-way ANOVA               | legend | n=3, for Gapdh; n=4, for Hoxa2; n=4, for Myod1                                     | rats from at least 3 litters/group<br>2 animals pooled/<br>sample | legend | mean +/- SEM | legend | p<0.001  | legend | F(2,8)=24.32  |  |
| + | - | sf9s | one-way ANOVA               | legend | n=4/<br>group                                                                      | rats from at least 3 litters/group<br>2 animals pooled/<br>sample | legend | mean +/- SEM | legend | p=0.008  | legend | F(2,9)=8.483  |  |
| + | - | sf9t | student's t test (unpaired) | legend | n=6/<br>group                                                                      | rats from at least 2 litters/group<br>2 animals pooled/<br>sample | legend | mean +/- SEM | legend | p=0.0433 | legend | t(10)=2.313   |  |
| + | - | sf9u | student's t test (unpaired) | legend | n=5/<br>group                                                                      | rats from at least 2 litters/group<br>2 animals pooled/<br>sample | legend | mean +/- SEM | legend | p=0.0304 | legend | t(8)=2.625    |  |
| + | - | sf9v | one-way ANOVA               | legend | n=2/<br>group,<br>for Bdnf,<br>Pitx3,Th;<br>n=3/<br>group,<br>for<br>Myod1,<br>Afm | rats from at least 4 litters/group<br>2 animals pooled/<br>sample | legend | mean +/- SEM | legend | p=0.004  | legend | F(4,7)=11.057 |  |
| + | - |      |                             |        |                                                                                    |                                                                   |        |              |        |          |        |               |  |

## ► Representative figures

1. Are any representative images shown (including Western blots and immunohistochemistry/staining) in the paper?

If so, what figure(s)?

Yes.

Fig. 3g, Fig. 4c, Fig. 4e, and Fig. 5g;  
Supplementary Figs. 3b, 4a-c, and 7c-e

2. For each representative image, is there a clear statement of how many times this experiment was successfully repeated and a discussion of any limitations in repeatability?

If so, where is this reported (section, paragraph #)?

- Histology figures (Fig. 3g, Fig. 4c, Fig. 4e, and Fig. 5g) showing localization of viral-mediated gene do not depend on repetitions but this experiment repeated independently at least 2 times (described in Methods "Immunohistochemistry" and figure legends).  
- Western blotting (sf.4 and sf.7) were repeated twice with no limitations of reproducibility (described in Methods "Western blotting").

## ► Statistics and general methods

1. Is there a justification of the sample size?

If so, how was it justified?

Where (section, paragraph #)?

Even if no sample size calculation was performed, authors should report why the sample size is adequate to measure their effect size.

No statistical methods were used to predetermine sample sizes, but our sample sizes are similar to those reported in previous works and based on expected effect sizes and power analyses.

2. Are statistical tests justified as appropriate for every figure?

Where (section, paragraph #)?

Yes.

- a. If there is a section summarizing the statistical methods in the methods, is the statistical test for each experiment clearly defined?

Yes, all statistical tests are described in Methods "Statistical analysis".

- b. Do the data meet the assumptions of the specific statistical test you chose (e.g. normality for a parametric test)?

Where is this described (section, paragraph #)?

Yes. But non-parametric tests were used in the events that normal distribution could not be assumed (described in Methods "Statistical analysis").

- c. Is there any estimate of variance within each group of data?  
Is the variance similar between groups that are being statistically compared?

Where is this described (section, paragraph #)?

Yes. homogeneity of variance was assessed. But Student's t test with Welch's correction was used in the events that equality of variance could not be assumed (e.g., Fig. 5f and Fig. 5j). This is described in figure legend and Methods "Statistical analysis".

- d. Are tests specified as one- or two-sided?

Yes, two-sided.

- e. Are there adjustments for multiple comparisons?

Yes, these are indicated in figure legend where necessary.

3. Are criteria for excluding data points reported?

Was this criterion established prior to data collection?

Where is this described (section, paragraph #)?

Yes, outliers were excluded when identified as outlier using the Grubbs test (described in Methods "Statistical analysis"). But this happened only occasionally.

4. Define the method of randomization used to assign subjects (or samples) to the experimental groups and to collect and process data.  
If no randomization was used, state so.  
Where does this appear (section, paragraph #)?
- Animals were assigned to various experimental groups randomly before treatment and surgery. Additionally, the order of the animals was randomized before behavioral tests (described in Methods "Animals" and "Statistical analysis").
5. Is a statement of the extent to which investigator knew the group allocation during the experiment and in assessing outcome included?  
If no blinding was done, state so.  
Where (section, paragraph #)?
- Data collection and analysis were not performed blind to the conditions of the experiments (described in Methods "Statistical analysis").
6. For experiments in live vertebrates, is a statement of compliance with ethical guidelines/regulations included?  
Where (section, paragraph #)?
- Yes, described in Methods "Animals".
7. Is the species of the animals used reported?  
Where (section, paragraph #)?
- Yes, described in Methods "Animals".
8. Is the strain of the animals (including background strains of KO/transgenic animals used) reported?  
Where (section, paragraph #)?
- Background of floxed CREB is C57BL/6 and that of floxed BDNF is BL6/sv129 (described in Methods "Animals").
9. Is the sex of the animals/subjects used reported?  
Where (section, paragraph #)?
- Yes, all animal used are males (described in Methods "Animals").
10. Is the age of the animals/subjects reported?  
Where (section, paragraph #)?
- Yes, described in Methods "Animals".
11. For animals housed in a vivarium, is the light/dark cycle reported?  
Where (section, paragraph #)?
- Yes, described in Methods "Animals".
12. For animals housed in a vivarium, is the housing group (i.e. number of animals per cage) reported?  
Where (section, paragraph #)?
- All animals were housed in group of 2 rats or of 2-5 mice per cage (described in Methods "Animals").
13. For behavioral experiments, is the time of day reported (e.g. light or dark cycle)?  
Where (section, paragraph #)?
- All behavioral experiments, except self-administration, were performed during the light cycle (described in Methods "Animals").
14. Is the previous history of the animals/subjects (e.g. prior drug administration, surgery, behavioral testing) reported?  
Where (section, paragraph #)?
- All animals used were experimentally naive (described in Methods "Animals").

- a. If multiple behavioral tests were conducted in the same group of animals, is this reported?

N/A

Where (section, paragraph #)?

15. If any animals/subjects were excluded from analysis, is this reported?

Yes, one western blot (e.g., Supplementary fig. 10c) of internal control did not appropriately appear and was not included for analysis. This is reported in figure legend of sf.10.

Where (section, paragraph #)?

- a. How were the criteria for exclusion defined?

N/A

Where is this described (section, paragraph #)?

- b. Specify reasons for any discrepancy between the number of animals at the beginning and end of the study.

Viral targeting to VTA was confirmed for all animals; <3% were excluded for anatomically incorrect placements (described in Methods "HSV vectors").

Where is this described (section, paragraph #)?

## ▶ Reagents

1. Have antibodies been validated for use in the system under study (assay and species)?

Yes.

- a. Is antibody catalog number given?

Yes, described in Methods "qChIP", "Immunohistochemistry", "Western blotting", "Experiment 2", "Experiment 3", and "Experiment 5".

Where does this appear (section, paragraph #)?

- b. Where were the validation data reported (citation, supplementary information, Antibodypedia)?

See Supplementary figs 7 & 9 and Supplementary table 4 for validation of antibodies for ChIP assays with rat tissues.

Where does this appear (section, paragraph #)?

2. If cell lines were used to reflect the properties of a particular tissue or disease state, is their source identified?

N/A

Where (section, paragraph #)?

- a. Were they recently authenticated?

N/A

Where is this information reported (section, paragraph #)?

## ▶ Data deposition

Data deposition in a public repository is mandatory for:

- Protein, DNA and RNA sequences
- Macromolecular structures
- Crystallographic data for small molecules
- Microarray data

Deposition is strongly recommended for many other datasets for which structured public repositories exist; more details on our data policy are available [here](#). We encourage the provision of other source data in supplementary information or in unstructured repositories such as [Figshare](#) and [Dryad](#).

- Are accession codes for deposit dates provided?

Where (section, paragraph #)?

N/A

## ▶ Computer code/software

Any custom algorithm/software that is central to the methods must be supplied by the authors in a usable and readable form for readers at the time of publication. However, referees may ask for this information at any time during the review process.

- Identify all custom software or scripts that were required to conduct the study and where in the procedures each was used.

N/A

- Is computer source code/software provided with the paper or deposited in a public repository? Indicate in what form this is provided or how it can be obtained.

N/A

## ▶ Human subjects

- Which IRB approved the protocol?

Where is this stated (section, paragraph #)?

The Department of Forensic Medicine at Semmelweis University, Hungary and the National Institute of Forensic Medicine, Karolinska Institutet, Stockholm, Sweden (described in Methods "Human postmortem subjects").

- Is demographic information on all subjects provided?

Where (section, paragraph #)?

Yes, see Supplementary Table 1.

- Is the number of human subjects, their age and sex clearly defined?

Where (section, paragraph #)?

Yes, see Supplementary Table 1.

- Are the inclusion and exclusion criteria (if any) clearly specified?

Where (section, paragraph #)?

Yes, described in Methods "Human postmortem subjects".

- How well were the groups matched?

Where is this information described (section, paragraph #)?

Yes, groups were matched for mean subject age and pH, as well as sex. See Supplementary Table 1.

6. Is a statement included confirming that informed consent was obtained from all subjects?

Where (section, paragraph #)?

N/A

7. For publication of patient photos, is a statement included confirming that consent to publish was obtained?

Where (section, paragraph #)?

N/A

## ► fMRI studies

For papers reporting functional imaging (fMRI) results please ensure that these minimal reporting guidelines are met and that all this information is clearly provided in the methods:

1. Were any subjects scanned but then rejected for the analysis after the data was collected?

N/A

- a. If yes, is the number rejected and reasons for rejection described?

Where (section, paragraph #)?

N/A

2. Is the number of blocks, trials or experimental units per session and/or subjects specified?

Where (section, paragraph #)?

N/A

3. Is the length of each trial and interval between trials specified?

N/A

4. Is a blocked, event-related, or mixed design being used? If applicable, please specify the block length or how the event-related or mixed design was optimized.

N/A

5. Is the task design clearly described?

Where (section, paragraph #)?

N/A

6. How was behavioral performance measured?

N/A

7. Is an ANOVA or factorial design being used?

N/A

8. For data acquisition, is a whole brain scan used?

If not, state area of acquisition.

N/A

- a. How was this region determined?

N/A

9. Is the field strength (in Tesla) of the MRI system stated?
- a. Is the pulse sequence type (gradient/spin echo, EPI/spiral) stated?
- b. Are the field-of-view, matrix size, slice thickness, and TE/TR/flip angle clearly stated?
10. Are the software and specific parameters (model/functions, smoothing kernel size if applicable, etc.) used for data processing and pre-processing clearly stated?
11. Is the coordinate space for the anatomical/functional imaging data clearly defined as subject/native space or standardized stereotaxic space, e.g., original Talairach, MNI305, ICBM152, etc? Where (section, paragraph #)?
12. If there was data normalization/standardization to a specific space template, are the type of transformation (linear vs. nonlinear) used and image types being transformed clearly described? Where (section, paragraph #)?
13. How were anatomical locations determined, e.g., via an automated labeling algorithm (AAL), standardized coordinate database (Talairach daemon), probabilistic atlases, etc.?
14. Were any additional regressors (behavioral covariates, motion etc) used?
15. Is the contrast construction clearly defined?
16. Is a mixed/random effects or fixed inference used?
- a. If fixed effects inference used, is this justified?
17. Were repeated measures used (multiple measurements per subject)?
- a. If so, are the method to account for within subject correlation and the assumptions made about variance clearly stated?
18. If the threshold used for inference and visualization in figures varies, is this clearly stated?
19. Are statistical inferences corrected for multiple comparisons?
- a. If not, is this labeled as uncorrected?



20. Are the results based on an ROI (region of interest) analysis?

N/A

a. If so, is the rationale clearly described?

N/A

b. How were the ROI's defined (functional vs anatomical localization)?

N/A

21. Is there correction for multiple comparisons within each voxel?

N/A

22. For cluster-wise significance, is the cluster-defining threshold and the corrected significance level defined?

N/A

## ► Additional comments

---

Additional Comments
